## Inferring Phylogenetic Networks Using PhyloNet

DINGQIAO WEN<sup>1</sup>, YUN YU<sup>1</sup>, JIAFAN ZHU<sup>1</sup>, LUAY NAKHLEH<sup>1,2,\*</sup>

<sup>1</sup>Computer Science, Rice University, Houston, TX, USA; <sup>2</sup>BioSciences, Rice University, Houston, TX, USA;

\*Correspondence to be sent to: Computer Science, Rice University, Houston, TX, USA; E-mail: nakhleh@rice.edu.

**Abstract.**—PhyloNet was released in 2008 as a software package for representing and analyzing phylogenetic networks. At the time of its release, the main functionalities in PhyloNet consisted of measures for comparing network topologies and a single heuristic for reconciling gene trees with a species tree. Since then, PhyloNet has grown significantly. The software package now includes a wide array of methods for inferring phylogenetic networks from data sets of unlinked loci while accounting for both reticulation (e.g., hybridization) and incomplete lineage sorting. In particular, PhyloNet now allows for maximum parsimony, maximum likelihood, and Bayesian inference of phylogenetic networks from gene tree estimates. Furthermore, Bayesian inference directly from sequence data (sequence alignments or bi-allelic markers) is implemented. Maximum parsimony is based on an extension of the “minimizing deep coalescences” criterion to phylogenetic networks, whereas maximum likelihood and Bayesian inference are based on the multispecies network coalescent. All methods allow for multiple individuals per species. As computing the likelihood of a phylogenetic network is computationally hard, PhyloNet allows for evaluation and inference of networks using a pseudo-likelihood measure. PhyloNet summarizes the results of the various analyses, and generates phylogenetic networks in the extended Newick format that is readily viewable by existing visualization software. [phylogenetic networks; reticulation; incomplete lineage sorting; multispecies network coalescent; Bayesian inference; maximum likelihood; maximum parsimony.]

1 With the increasing availability of whole-genome and  
2 multi-locus data sets, an explosion in the development of  
3 methods for species tree inference from such data ensued.  
4 In particular, the multispecies coalescent (Degnan and  
5 Rosenberg, 2009) played a central role in explaining and  
6 modeling the phenomenon of gene tree incongruence due  
7 to incomplete lineage sorting (ILS), as well as in devising  
8 computational methods for species tree inference in the  
9 presence of ILS; e.g., (Heled and Drummond, 2010; Liu,  
10 2008).

11 Nevertheless, with the increasing recognition that the  
12 evolutionary histories of several groups of closely related  
13 species are reticulate (Mallet et al., 2016), there is need  
14 for developing methods that infer species phylogenies  
15 while accounting not only for ILS but also for processes  
16 such as hybridization. Such reticulate species phylogenies  
17 are modeled by *phylogenetic networks* (Nakhleh, 2010).  
18 A phylogenetic network extends the phylogenetic tree  
19 model by allowing for horizontal edges that capture the  
20 inheritance of genetic material through gene flow (Fig.  
1(a)). While the phylogenetic network captures how the

23 within its branches capture the evolutionary histories  
24 of individual, recombination-free loci (Fig. 1(b)). The  
25 relationship between phylogenetic networks and trees  
26 is complex in the presence of ILS (Zhu et al., 2016).  
27 Mathematically, the topology of a phylogenetic network  
28 takes the form of a rooted, directed, acyclic graph. In  
29 particular, while gene flow involves contemporaneous  
30 species or populations, past extinctions or incomplete  
31 sampling for taxa sometimes result in horizontal edges  
32 that appear to be “forward in time” (Fig. 1). It is  
33 important to account for such an event, which is why  
34 acyclicity, rather than having truly horizontal edges, is  
35 the only constraint that should be imposed on rooted  
36 directed graphs, in practice, if one is to model reticulate  
37 evolutionary histories.

38 For inference of phylogenetic networks from multi-  
39 locus data sets, the notions of coalescent histories and  
40 the multispecies coalescent were extended to  
41 phylogenetic networks (Yu et al., 2012, 2011). Based on  
42 these new models, the “minimizing deep coalescence”  
43 criterion (Maddison, 1997; Than and Nakhleh, 2009) was  
44 extended to phylogenetic networks, which allowed for a  
45 maximum parsimony inference of phylogenetic networks  
46 from the gene tree estimates of unlinked loci (Yu et al.,  
47 2013a). Subsequently, maximum likelihood inference  
48 (from gene tree estimates) via hill-climbing heuristics  
49 and Bayesian inference via reversible-jump Markov chain  
50 Monte Carlo (RJMCMC) were devised (Wen et al.,  
51 2016; Yu et al., 2014). As computing the likelihood of a  
52 phylogenetic network formed a major bottleneck in the  
53 inference, speedup techniques for likelihood calculations  
54 and pseudo-likelihood of phylogenetic networks were  
55 introduced (Yu and Nakhleh, 2015b; Yu et al., 2013b).  
56 Finally, to enable direct estimation from sequence data,  
57 new methods were developed for Bayesian inference  
58 from sequence alignments of unlinked loci (Wen and  
59 Nakhleh, 2017) as well as bi-allelic markers of unlinked

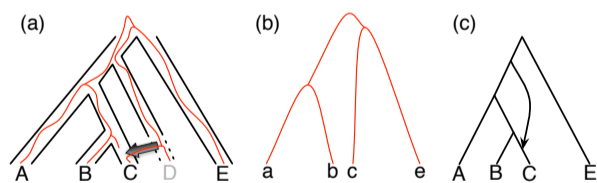

FIGURE 1. (a) A phylogenetic network on five taxa, with taxon  $D$  missing (due to extinction or incomplete sampling), and a hybridization involving (ancestors of) taxa  $D$  and  $C$ . Shown within the branches of the phylogenetic network is a tree of a recombination-free locus whose evolutionary history includes introgression. (b) The gene tree that would be estimated, barring inference error, on the locus illustrated in (a). (c) An abstract depiction of the phylogenetic network of (a) given that taxon  $D$  is missing.

21 species, or populations, have evolved, gene trees growing  
22

1 loci (Zhu et al., 2017). Here we introduce PhyloNet 3, a  
 2 software package for phylogenetic network inference from  
 3 multi-locus data under the aforementioned models and  
 4 criteria. This version is a significant expansion of the  
 5 version reported on in (Than et al., 2008). Phylogenetic  
 6 networks inferred by PhyloNet are represented using an  
 7 extended Newick format and can be readily visualized by  
 8 Dendroscope (Huson and Scornavacca, 2012).

## 9 MODELS AND MAIN INFERENCE FEATURES

### 10 *Simple Counts of Extra Lineages: Maximum Parsimony*

11 Minimizing the number of deep coalescences, or  
 12 MDC, is a criterion that was proposed originally by  
 13 Maddison (Maddison, 1997) for species tree inference  
 14 and later implemented and tested in both heuristic form  
 15 (Maddison and Knowles, 2006) and exact algorithms  
 16 (Than and Nakhleh, 2009). Yu et al. (Yu et al., 2013a)  
 17 extended the MDC criterion to phylogenetic networks.  
 18 The **InferNetwork\_MP** command infers a species  
 19 network with a specified number of reticulation nodes  
 20 under the extended MDC criterion. Inference under this  
 21 criterion is done via a local search heuristic, and the  
 22 phylogenetic networks returned by the program include,  
 23 in addition to the topologies, the inheritance probability  
 24 estimates, as well as the number of extra lineages on  
 25 each branch of the network, and the total number of  
 26 extra lineages of the phylogenetic network. For this  
 27 program, only gene tree topologies are used as input  
 28 (that is, gene tree branch lengths are irrelevant), and  
 29 the number of individuals per species could vary across  
 30 loci. Furthermore, to account for uncertainty in the input  
 31 gene tree estimates, the program allows for a set of  
 32 gene trees per locus that could be obtained from a  
 33 bootstrap analysis or a posterior sample on the sequences  
 34 of the respective locus. For inference under the MDC  
 35 criterion, the maximum number of reticulation events in  
 36 the phylogenetic network must be specified *a priori*. Full  
 37 details of the MDC criterion for phylogenetic networks  
 38 and the inference heuristics can be found in (Yu et al.,  
 39 2013a).

40 Inference based on the MDC criterion does not allow  
 41 for estimating branch lengths or any other associated  
 42 parameters of the inferred phylogenetic network beyond  
 43 the topology and inheritance probabilities.

### 44 *When the Species Phylogeny’s Branches Are Too Short: 45 Maximum Likelihood*

46 One limitation of inference based on the MDC criterion  
 47 is the inability to estimate parameter values beyond  
 48 the network’s topology. Another limitation is the fact  
 49 that such inference is not statistically consistent for  
 50 species trees (Than and Rosenberg, 2011), which implies  
 51 problems in the case of phylogenetic network inference  
 52 based on the criterion as well (more on the notion of  
 53 “statistical consistency” in the case of networks below).  
 54 The latter problem arises especially when the species

55 phylogeny has very short branches. To address these  
 56 two limitations, Yu et al. (Yu et al., 2014) implemented  
 57 maximum likelihood estimation of phylogenetic networks  
 58 based on the multispecies network coalescent (Yu  
 59 et al., 2012). The **InferNetwork\_ML** command infers  
 60 a maximum likelihood species network(s) along with  
 61 its branch lengths (in coalescent units) and inheritance  
 62 probabilities. During the search, the branch lengths and  
 63 inheritance probabilities of a proposed species network  
 64 can be either sampled or optimized (the former is much  
 65 faster and has been shown to perform very well). The  
 66 input consists of either rooted gene tree topologies  
 67 alone, or rooted gene trees with branch lengths (in  
 68 coalescent units). If the gene tree branch lengths are  
 69 to be used, the gene trees must be ultrametric. As in  
 70 the case of maximum parsimony inference, local search  
 71 heuristics are used to obtain the maximum likelihood  
 72 estimates. Furthermore, multiple individuals per species  
 73 could be used, and their numbers could vary across loci.  
 74 Multiple gene trees per locus could be used, as above,  
 75 to account for uncertainty in the gene tree estimates.  
 76 The user can either specify the maximum number of  
 77 reticulation events *a priori* or utilize the cross-validation  
 78 (the **InferNetwork\_ML\_CV** command) or bootstrap  
 79 (the **InferNetwork\_ML\_Bootstrap** command) to  
 80 determine the model complexity. Furthermore, several  
 81 information criteria (AIC, BIC, and AICs) are  
 82 implemented. Full details of the maximum likelihood  
 83 inference of phylogenetic networks and the inference  
 84 heuristics can be found in (Yu et al., 2014).

85 It is important to note that computing the  
 86 likelihood of a phylogenetic network is a major  
 87 computational bottleneck in all statistical inference  
 88 methods implemented in PhyloNet. To ameliorate  
 89 this problem, PhyloNet also allows for inference of  
 90 phylogenetic networks based on a “pseudo-likelihood”  
 91 measure, via the **InferNetwork\_MPL** command.  
 92 However, for this method, the input could consist  
 93 only of gene tree topologies (branch lengths are not  
 94 allowed). Multiple individuals per species, as well as non-  
 95 binary gene trees, are also allowed. Full details about  
 96 inference under pseudo-likelihood can be found in (Yu  
 97 and Nakhleh, 2015b).

### 98 *Penalizing Network Complexity: Bayesian Inference*

99 Discussing statistical inference in general, Attias  
 100 (Attias, 1999) listed three problems with maximum  
 101 likelihood: “First, it produces a model that overfits  
 102 the data and subsequently have [sic] suboptimal  
 103 generalization performance. Second, it cannot be used to  
 104 learn the structure of the graph, since more complicated  
 105 graphs assign a higher likelihood to the data. Third, it  
 106 is computationally tractable only for a small class of  
 107 models.” When the model of interest in a phylogenetic  
 108 tree, the first two problems are generally not of concern  
 109 (barring the complexity of the model of evolution  
 110 underlying the inference). Putting aside the problem of  
 111 computational tractability, the first two problems listed

1 by Attias are an Achilles heel for phylogenetic network  
2 inference by maximum likelihood.

3 Phylogenetic networks can be viewed as mixture  
4 models whose components are distributions defined  
5 by parental trees of the network (Zhu et al., 2016).  
6 Inferring the true model in the case of phylogenetic  
7 networks includes determining, in addition to many  
8 other parameters, the true number of reticulations.  
9 Inference of such a model based on an unpenalized  
10 likelihood can rarely work since, as Attias pointed out,  
11 “more complicated graphs assign a higher likelihood.”  
12 In fact, the notion of *statistical consistency*, which  
13 has been a staple in the literature on phylogenetic  
14 tree inference, is not even applicable in the case  
15 of maximum (unpenalized) likelihood of phylogenetic  
16 networks—it is easy to imagine scenarios where adding  
17 more reticulations to the true phylogeny would only  
18 improve the likelihood. Therefore, in analyzing data  
19 sets under the aforementioned likelihood-based inference  
20 methods we recommend experimenting with varying the  
21 maximum allowed number of reticulation events and  
22 inspecting the likelihoods of the models with different  
23 numbers of reticulations.

24 A more principled way to deal with model complexity  
25 is via Bayesian inference, which allows, among other  
26 things, for regularization via the prior distribution. The  
27 **MCMC\_GT** command performs Bayesian inference  
28 of the posterior distribution of the species network  
29 along with its branch lengths (in coalescent units)  
30 and inheritance probabilities via reversible-jump Markov  
31 chain Monte Carlo (RJMCMC). The input consists of  
32 single or multiple rooted gene tree topologies per locus,  
33 as above, and the number of individuals per species could  
34 vary across loci. Full details of the Bayesian inference of  
35 phylogenetic networks can be found in (Wen et al., 2016).

36 To handle gene tree uncertainty in a principled  
37 manner, and to allow for inferring the values of various  
38 network-associated parameters, PhyloNet implements  
39 Bayesian inference of phylogenetic networks directly  
40 from sequence data. The **MCMC\_SEQ** command  
41 performs Bayesian inference of the posterior distribution  
42 of the species network along with its divergence  
43 times (in units of expected number of mutations  
44 per site) and population mutation rates (in units of  
45 population mutation per site), inheritance probabilities,  
46 and ultrametric gene trees along with its coalescent  
47 times (in units of expected number of mutations  
48 per site) simultaneously via RJMCMC. The input  
49 consists of sequence alignments of unlinked loci. Multiple  
50 individuals per species could be used, and their  
51 numbers could vary across loci. Full details of the  
52 co-estimation method can be found in (Wen and  
53 Nakhleh, 2017). The **MCMC\_BiMarkers** command,  
54 on the other hand, performs Bayesian inference of  
55 the posterior distribution of the species network  
56 along with its divergence times (in units of expected  
57 number of mutations per site), population mutation  
58 rates (in units of population mutation per site), and  
59 inheritance probabilities via RJMCMC. The input  
60 consists of bi-allelic markers of unlinked loci, most

61 notably single nucleotide polymorphisms (SNPs) and  
62 amplified fragment length polymorphisms (AFLP). Also,  
63 multiple individuals per species could be used. This  
64 method carries out numerical integration over all gene  
65 trees, which allows it to completely sidestep the issue of  
66 sampling gene trees. Full details of the computation can  
67 be found in (Zhu et al., 2017).

### 68 *Other Features*

69 In addition to the aforementioned inference methods  
70 and all the functionalities that existed in the old version  
71 of PhyloNet (Than et al., 2008), the software package  
72 includes new features that help with other types of  
73 analyses.

74 As trees are a special case of networks, all the features  
75 above allow for species tree inference by simply setting  
76 the number of reticulations allowed during the analysis to  
77 0. Additionally, PhyloNet implements greedy consensus,  
78 the “democratic vote,” and the GLASS method of  
79 (Mossel and Roch, 2010).

80 PhyloNet also includes a method for distance-based  
81 inference of phylogenetic networks (Yu and Nakhleh,  
82 2015a), as well as a Gibbs sampling method for  
83 estimating the parameters of a given phylogenetic  
84 network (Yu et al., 2016).

85 Last but not least, the **SimGTinNetwork** and  
86 **SimBiMarkersinNetwork** simulate gene trees and bi-  
87 allelic markers, respectively, on a phylogenetic network.  
88 In particular, the former automates the process of  
89 simulating gene trees in the presence of reticulation  
90 and incomplete lineage sorting using the program  
91 **ms** (Hudson, 2002). The latter command extends the  
92 simulator developed in (Bryant et al., 2012).

### 93 INPUT AND OUTPUT FORMATS

94 PhyloNet 3 is a software package in the JAR format  
95 that can be installed and executed on any system with  
96 the Java Platform (Version 7.0 or higher). The command  
97 line in a command prompt is

```
98 java -jar PhyloNet_X.Y.Z.jar script.nex
```

99 where **X.Y.Z** is the version number (version 3.6.1  
100 is the most recent release), and **script.nex** is the  
101 input NEXUS file containing data and the PhyloNet  
102 commands to be executed.

103 The input data and the commands are listed in  
104 blocks. Each block start with the “BEGIN” keyword and  
105 terminate with the “END;” keyword. Commands in a  
106 PHYLONET block begin with a command identifier and  
107 terminate with a semicolon.

108 In the example input file below, to estimate the  
109 posterior distribution of the species network and the gene  
110 trees, the input sequence alignments are listed in the  
111 “DATA” block. The starting gene tree for each locus  
112 and the starting network, which is optional, can be  
113 specified in the “TREES” block and the “NETWORKS”

1 block, respectively. Finally the command *MCMC\_SEQ*  
 2 and its parameters are provided for execution in the  
 3 “PHYLONET” block. Details about specific parameters  
 4 for a given command can be found on the website of  
 5 PhyloNet.

```

6 #NEXUS
7
8 BEGIN DATA;
9     Dimensions ntax=3 nchar=35;
10    Format datatype=dna symbols="ACTG" missing=?
11    gap=-;
12    Matrix
13    [locus0, 15]
14    A TCGCGCTAACGTCCA
15    B GCGCACCTACTGCGG
16    B GCGCACCTACTCCGG
17    [locus1, 20]
18    A GAAACGGATCTAAGTGTACG
19    B CGCTCGGATCTAAGTGTACG
20    C CGCTCGGATCTAAGTGTACG
21    ;END;
22
23 BEGIN TREES;
24 Tree gt0 = (A:0.119,(B:0.058,C:0.058):0.061);
25 Tree gt1 = (A:0.068,(B:0.016,C:0.016):0.052);
26 END;
27
28 BEGIN NETWORKS;
29 Network net = ((B:0.0)#H1:0.05::0.8,(C:0.002,
30 #H1:0.002::0.2):0.048):0.01,A:0.06);
31 END;
32
33 BEGIN PHYLONET;
34 MCMC_SEQ -sgt (gt0,gt1) -snet net1 -sps 0.04;
35 END;

```

36 Gene trees are given in the Newick format, where the  
 37 values after the colons are the branch lengths. Networks  
 38 are given in the Rich Newick format which contains  
 39 hybridization nodes denoted in “#H1”, “#H2”, ...,  
 40 “#Hn”, where *n* is the number of reticulations in the  
 41 network. The branch lengths, the population mutation  
 42 rates, and the inheritance probabilities are specified after  
 43 the first, second and third colons, respectively. Note that  
 44 the units of branch lengths (for both trees and networks)  
 45 can either be coalescent units, or the number of expected  
 46 mutations per site, depending on the requirement of  
 47 PhyloNet command. The population mutation rate is  
 48 optional if the branch lengths are in the coalescent units,  
 49 or a constant population mutation rate across all the  
 50 branches is assumed. The inheritance probabilities are  
 51 only relevant for the hybridization nodes.

52 The **InferNetwork\_MP** command returns species  
 53 networks and the corresponding extra lineages. The  
 54 **InferNetwork\_ML** command and its relatives return  
 55 species networks and the corresponding likelihood values.  
 56 The total number of returned networks can be specified  
 57 via *-n* option for both commands. As we stated above,  
 58 the user can either specify the maximum number  
 59 of reticulation events or utilize the cross-validation,

60 bootstrap, information criteria to determine the model  
 61 complexity when using maximum likelihood approach.

62 For Bayesian inference, the program outputs the log  
 63 posterior probability, likelihood and prior for every  
 64 sample. When the MCMC chain ends, the overall  
 65 acceptance rates of the RJMCMC proposals and the  
 66 95% credible set of species networks (the smallest set  
 67 of all topologies that accounts for 95% of the posterior  
 68 probability) are reported. For every topology in the  
 69 95% credible set, the proportion of the topology being  
 70 sampled, the maximum posterior value (MAP) and  
 71 the corresponding MAP topology, the average posterior  
 72 value and the averaged (branch lengths and inheritance  
 73 probabilities) network are given. The model complexity  
 74 is controlled mainly by the Poisson prior on the number  
 75 of reticulations (see (Wen et al., 2016) for details). The  
 76 Poisson distribution parameter can be tuned via “-pp”  
 77 option.

## CONCLUSION

78  
 79 PhyloNet 3 is a comprehensive software package  
 80 for phylogenetic network inference, particularly in the  
 81 presence of incomplete lineage sorting. It implements  
 82 maximum parsimony, maximum likelihood, and Bayesian  
 83 inferences, in addition to a host of other features for  
 84 analyzing phylogenetic networks and simulating data on  
 85 them. The package is implemented in Java and is publicly  
 86 available as an executable as well as source files.

87 In terms of the main aim of PhyloNet, which  
 88 is the inference of phylogenetic networks, very few  
 89 tools exist. TreeMix (Pickrell and Pritchard, 2012)  
 90 is a very popular tool in the population genetics  
 91 community. It uses allele frequency data and mainly  
 92 targets analyses of admixtures among sub-populations  
 93 of a single species. More recently, Bayesian inference  
 94 of phylogenetic networks was implemented in BEAST2  
 95 (Zhang et al., 2017) and inference of unrooted networks  
 96 based on pseudo-likelihood was implemented in the  
 97 PhyloNetworks software package (Solís-Lemus et al.,  
 98 2017). However, in terms of implementing inference  
 99 under different criteria and from different types of data,  
 100 PhyloNet 3 is the most comprehensive.

101 As highlighted above, the challenge of computational  
 102 tractability aside, the major challenge with network  
 103 inference in general is determining the true number  
 104 of reticulations and guarding against overfitting. In  
 105 particular, phylogenetic networks are more complex  
 106 models than trees and can always fit the data at least  
 107 as well as trees do. Does this mean networks are simply  
 108 over-parameterized models that should be abandoned in  
 109 favor of trees? We argue that the answer is no. First,  
 110 if the evolutionary history is reticulate, a tree-based  
 111 method is unlikely to uncover the reticulation events  
 112 (their number and locations). Second, even if one is  
 113 interested in the species tree “despite reticulation,” a  
 114 species tree inference method might not correctly recover  
 115 the species tree (Solís-Lemus et al., 2016). Third, even  
 116 when the true evolutionary history is strictly treelike,



1 the network structure could be viewed as a graphical  
 2 representation of the variance around the tree structure.  
 3 Insisting on a sparse network for convenience or ease of  
 4 visual inspection is akin to insisting on a well-supported  
 5 model no matter what the data says. Needless to say,  
 6 one is interested in the true graph structure and not one  
 7 that is more complicated simply because it assigns higher  
 8 likelihood to the data. From our experience, the Bayesian  
 9 approaches handle this challenge very well.

10 While we continue to improve the features and user-  
 11 friendliness of the software package, the main direction  
 12 we are currently pursuing is achieving scalability of the  
 13 various inference methods in PhyloNet 3 to larger data  
 14 sets in terms of the numbers of taxa as well as loci.

#### 15 AVAILABILITY

16 PhyloNet is publicly available for download from  
 17 <https://bioinfoc.rice.edu/phyloNet>. It can be installed  
 18 and executed on any system with the Java Platform  
 19 (Version 7.0 or higher). The current release includes  
 20 source code, tutorials, example scripts, list of commands  
 21 and useful links.

#### 22 FUNDING

23 Development of the various functionalities in PhyloNet  
 24 has been generously supported by DOE (DE-FG02-  
 25 06ER25734), NIH (R01LM009494), and NSF (CCF-  
 26 0622037, DBI-1062463, CCF-1302179, CCF-1514177)  
 27 grants and Sloan and Guggenheim fellowships to L.N.  
 28 Author contributions: D.W., Y.Y., and J.Z. did almost  
 29 all the implementation and testing of the inference  
 30 features in PhyloNet 3; D.W., J.Z. and L.N. wrote the  
 31 paper.

#### 32 ACKNOWLEDGEMENTS

33 We would like to thank the PhyloNet users for  
 34 submitting bug reports, feature requests, and other  
 35 comments that helped us significantly improve the  
 36 software.

#### 37 REFERENCES

38 Attias, H. 1999. Inferring parameters and structure of latent  
 39 variable models by variational Bayes. Pages 21–30 *in*  
 40 Proceedings of the Fifteenth conference on Uncertainty in  
 41 artificial intelligence Morgan Kaufmann Publishers Inc.  
 42 Bryant, D., R. Bouckaert, J. Felsenstein, N. A. Rosenberg, and  
 43 A. RoyChoudhury. 2012. Inferring species trees directly from  
 44 biallelic genetic markers: bypassing gene trees in a full coalescent  
 45 analysis. *Molecular biology and evolution* 29:1917–1932.  
 46 Degnan, J. H. and N. A. Rosenberg. 2009. Gene tree discordance,  
 47 phylogenetic inference and the multispecies coalescent. *Trends*  
 48 *in ecology & evolution* 24:332–340.  
 49 Heled, J. and A. J. Drummond. 2010. Bayesian inference of species  
 50 trees from multilocus data. *Molecular biology and evolution*  
 51 27:570–580.  
 52 Hudson, R. 2002. Generating samples under a Wright-Fisher  
 53 neutral model of genetic variation. *Bioinformatics* 18:337–338.

Huson, D. H. and C. Scornavacca. 2012. Dendroscope 3: an  
 54 interactive tool for rooted phylogenetic trees and networks.  
 55 *Systematic biology* 61:1061–1067.  
 56 Liu, L. 2008. Best: Bayesian estimation of species trees under the  
 57 coalescent model. *Bioinformatics* 24:2542–2543.  
 58 Maddison, W. P. 1997. Gene trees in species trees. *Systematic*  
 59 *biology* 46:523–536.  
 60 Maddison, W. P. and L. L. Knowles. 2006. Inferring phylogeny  
 61 despite incomplete lineage sorting. *Systematic biology* 55:21–30.  
 62 Mallet, J., N. Besansky, and M. Hahn. 2016. How reticulated are  
 63 species? *BioEssays* 38:140–149.  
 64 Mossel, E. and S. Roch. 2010. Incomplete lineage sorting:  
 65 consistent phylogeny estimation from multiple loci. *IEEE/ACM*  
 66 *Transactions on Computational Biology and Bioinformatics*  
 67 (TCBB) 7:166–171.  
 68 Nakhleh, L. 2010. Evolutionary phylogenetic networks: models  
 69 and issues. Pages 125–158 *in* The Problem Solving Handbook  
 70 for Computational Biology and Bioinformatics (L. Heath and  
 71 N. Ramakrishnan, eds.). Springer, New York.  
 72 Pickrell, J. K. and J. K. Pritchard. 2012. Inference of population  
 73 splits and mixtures from genome-wide allele frequency data.  
 74 *PLoS Genetics* 8:e1002967.  
 75 Solís-Lemus, C., P. Bastide, and C. Ané. 2017. PhyloNetworks:  
 76 a package for phylogenetic networks. *Molecular biology and*  
 77 *evolution* 34:3292–3298.  
 78 Solís-Lemus, C., M. Yang, and C. Ané. 2016. Inconsistency of  
 79 species tree methods under gene flow. *Systematic Biology*  
 80 65:843–851.  
 81 Than, C. and L. Nakhleh. 2009. Species tree inference by  
 82 minimizing deep coalescences. *PLoS Computational Biology*  
 83 5:e1000501.  
 84 Than, C., D. Ruths, and L. Nakhleh. 2008. PhyloNet: a software  
 85 package for analyzing and reconstructing reticulate evolutionary  
 86 relationships. *BMC bioinformatics* 9:322.  
 87 Than, C. V. and N. A. Rosenberg. 2011. Consistency properties of  
 88 species tree inference by minimizing deep coalescences. *Journal*  
 89 *of Computational Biology* 18:1–15.  
 90 Wen, D. and L. Nakhleh. 2017. Co-estimating reticulate  
 91 phylogenies and gene trees from multi-locus sequence data.  
 92 *Systematic Biology* syx085.  
 93 Wen, D., Y. Yu, and L. Nakhleh. 2016. Bayesian inference  
 94 of reticulate phylogenies under the multispecies network  
 95 coalescent. *PLoS Genetics* 12:e1006006.  
 96 Yu, Y., R. M. Barnett, and L. Nakhleh. 2013a. Parsimonious  
 97 inference of hybridization in the presence of incomplete lineage  
 98 sorting. *Systematic biology* Page syt037.  
 99 Yu, Y., J. H. Degnan, and L. Nakhleh. 2012. The probability  
 100 of a gene tree topology within a phylogenetic network  
 101 with applications to hybridization detection. *PLoS genetics*  
 102 8:e1002660.  
 103 Yu, Y., J. Dong, K. J. Liu, and L. Nakhleh. 2014. Maximum  
 104 likelihood inference of reticulate evolutionary  
 105 histories. *Proceedings of the National Academy of Sciences*  
 106 111:16448–16453.  
 107 Yu, Y., C. Jermaine, and L. Nakhleh. 2016. Exploring phylogenetic  
 108 hypotheses via gibbs sampling on evolutionary networks. *BMC*  
 109 *genomics* 17:784.  
 110 Yu, Y. and L. Nakhleh. 2015a. A distance-based method for  
 111 inferring phylogenetic networks in the presence of incomplete  
 112 lineage sorting. Pages 378–389 *in* International Symposium on  
 113 Bioinformatics Research and Applications Springer.  
 114 Yu, Y. and L. Nakhleh. 2015b. A maximum pseudo-likelihood  
 115 approach for phylogenetic networks. *BMC genomics* 16:S10.  
 116 Yu, Y., N. Ristic, and L. Nakhleh. 2013b. Fast algorithms and  
 117 heuristics for phylogenomics under ILS and hybridization. *BMC*  
 118 *Bioinformatics* 14:S6.  
 119 Yu, Y., C. Than, J. H. Degnan, and L. Nakhleh. 2011. Coalescent  
 120 histories on phylogenetic networks and detection  
 121 of hybridization despite incomplete lineage sorting. *Systematic*  
 122 *Biology* 60:138–149.  
 123 Zhang, C., H. A. Ogilvie, A. J. Drummond, and T. Stadler. 2017.  
 124 Bayesian inference of species networks from multilocus sequence  
 125 data. *bioRxiv* Page 124982.  
 126

- 1 Zhu, J., D. Wen, Y. Yu, H. Meudt, and L. Nakhleh. 2017.
- 2 Bayesian inference of phylogenetic networks from bi-allelic
- 3 genetic markers. *PLoS Computational Biology* (in press).
- 4 Zhu, J., Y. Yu, and L. Nakhleh. 2016. In the light of
- 5 deep coalescence: revisiting trees within networks. *BMC*
- 6 *Bioinformatics* 17:271–282.
